# Supplementary material for: Distribution of polyphenolic and sugar compounds in different buckwheat plant parts
Source: Royal Society of Chemistry journal article supplement (doi:10.1039/d1ra04250e), 2021-01-01
Supplement: d1ra04250e1.pdf [file d1ra04250e1.pdf]

1 **Supplementary material**

2 **Distribution of polyphenolic and sugar compounds in different buckwheat plant parts**

3 Milica Nešović, ‡<sup>a</sup> Uroš Gašić, ‡<sup>\*\*b</sup> Tomislav Tosti,<sup>c</sup> Nikola Horvacki,<sup>d</sup> Nebojša Nedić,<sup>e</sup> Milica  
4 Sredojević,<sup>c</sup> Stevan Blagojević,<sup>a</sup> Ljubiša Ignjatović<sup>f</sup> and Živoslav Tešić\*<sup>c</sup>

5  
6 <sup>a</sup>Institute of General and Physical Chemistry, Studentski trg 12-16, 11158 Belgrade, Serbia

7 <sup>b</sup>Institute for Biological Research “Siniša Stanković”, University of Belgrade, Bulevar despota  
8 Stefana 142, 11060 Belgrade, Serbia

9 <sup>c</sup>University of Belgrade - Faculty of Chemistry, Studentski trg 12-16, 11158 Belgrade, Serbia

10 <sup>d</sup>University of Belgrade - Faculty of Physical Chemistry, Studentski trg 12-16, 11158 Belgrade,  
11 Serbia

12 <sup>a</sup>Institute of General and Physical Chemistry, Studentski trg 12-16, 11158 Belgrade, Serbia

13 <sup>b</sup>Department of Plant Physiology, Institute for Biological Research “Siniša Stanković”, National  
14 Institute of Republic of Serbia, University of Belgrade, Bulevar despota Stefana 142, 11060  
15 Belgrade, Serbia

16 <sup>c</sup>University of Belgrade - Faculty of Chemistry, Studentski trg 12-16, 11158 Belgrade, Serbia

17 <sup>d</sup>Innovation Center, University of Belgrade – Faculty of Chemistry, Studentski trg 12-16, 11158  
18 Belgrade, Serbia

19 <sup>e</sup>Faculty of Agriculture, Institute for zootechnics, University of Belgrade, Nemanjina 6, 11080  
20 Belgrade - Zemun, Serbia

21 <sup>f</sup>University of Belgrade - Faculty of Physical Chemistry, Studentski trg 12-16, 11158 Belgrade,  
22 Serbia

23 ‡ M. Nešović and U. Gašić contributed equally to this work.

24 \*Corresponding author

25

26 **Table S1**

27 The list of analyzed sugars with validation parameters for quantification.

| <b>Sugar compound</b> | <b>R<sup>2</sup></b> | <b>Recovery (%)</b> | <b>CV (%)</b> | <b>LOD (ppm)</b> | <b>LOQ (ppm)</b> |
|-----------------------|----------------------|---------------------|---------------|------------------|------------------|
| <b>Glucose</b>        | 0.9998               | 93.58 – 108.22      | 3,25          | 2.55             | 8.52             |
| <b>Fructose</b>       | 0.9988               | 96.14 – 102.98      | 6.12          | 1.46             | 4.87             |
| <b>Xylose</b>         | 0.9993               | 98.33 – 104.25      | 1.58          | 0.47             | 1.55             |
| <b>Arabinose</b>      | 0.9963               | 96.32 – 107.36      | 1.03          | 0.33             | 1.01             |
| <b>Rhamnose</b>       | 0.9991               | 94.39 – 109.32      | 4.18          | 063              | 2.09             |
| <b>Sucrose</b>        | 0.9990               | 93.03 – 105.05      | 4.97          | 0.19             | 0.62             |
| <b>Maltose</b>        | 0.9965               | 93.81 – 103.60      | 3.35          | 0.27             | 0.91             |
| <b>Isomaltose</b>     | 0.9953               | 95.89 – 105.21      | 2.98          | 0.35             | 1.16             |
| <b>Trehalose</b>      | 0.9989               | 96.98 – 106.03      | 2.39          | 0.40             | 1.33             |
| <b>Turanose</b>       | 0.9992               | 91.97 – 105.83      | 2.75          | 0.24             | 0.81             |
| <b>Melibiose</b>      | 0.9974               | 93.65 – 107.77      | 1.98          | 0.35             | 1.15             |
| <b>Gentiobiose</b>    | 0.9956               | 92.78 – 105.63      | 3.68          | 0.55             | 1.81             |
| <b>Melesitose</b>     | 0.9957               | 93.12 – 108.54      | 3.21          | 0.27             | 0.90             |
| <b>Raffinose</b>      | 0.9994               | 95.63 – 108.36      | 3.65          | 0.32             | 1.06             |
| <b>Maltotriose</b>    | 0.9920               | 95.36 – 107.32      | 1.37          | 0.30             | 0.99             |
| <b>Panose</b>         | 0.9989               | 92.31 – 104.63      | 4.98          | 0.53             | 1.75             |
| <b>Erythritol</b>     | 0.9975               | 90.99 – 104.63      | 3.65          | 0.45             | 1.48             |
| <b>Glycerol</b>       | 0.9974               | 91.65 – 107.36      | 2.53          | 0.19             | 0.63             |
| <b>Sorbitol</b>       | 0.9994               | 94.58 – 108.54      | 1.56          | 0.22             | 0.74             |
| <b>Galactitol</b>     | 0.9989               | 95.87 – 106.32      | 1.47          | 0.49             | 1.62             |
| <b>Mannitol</b>       | 0.9986               | 92.11 – 106.89      | 1.95          | 0.38             | 1.25             |

The calibration range was from 10-100 ppm for glucose and fructose, whereas all the others analytes were in the range from 1-10 ppm. The accuracy and precision was confirmed by participation in proficiency testing where all the y scores were lower than 1.

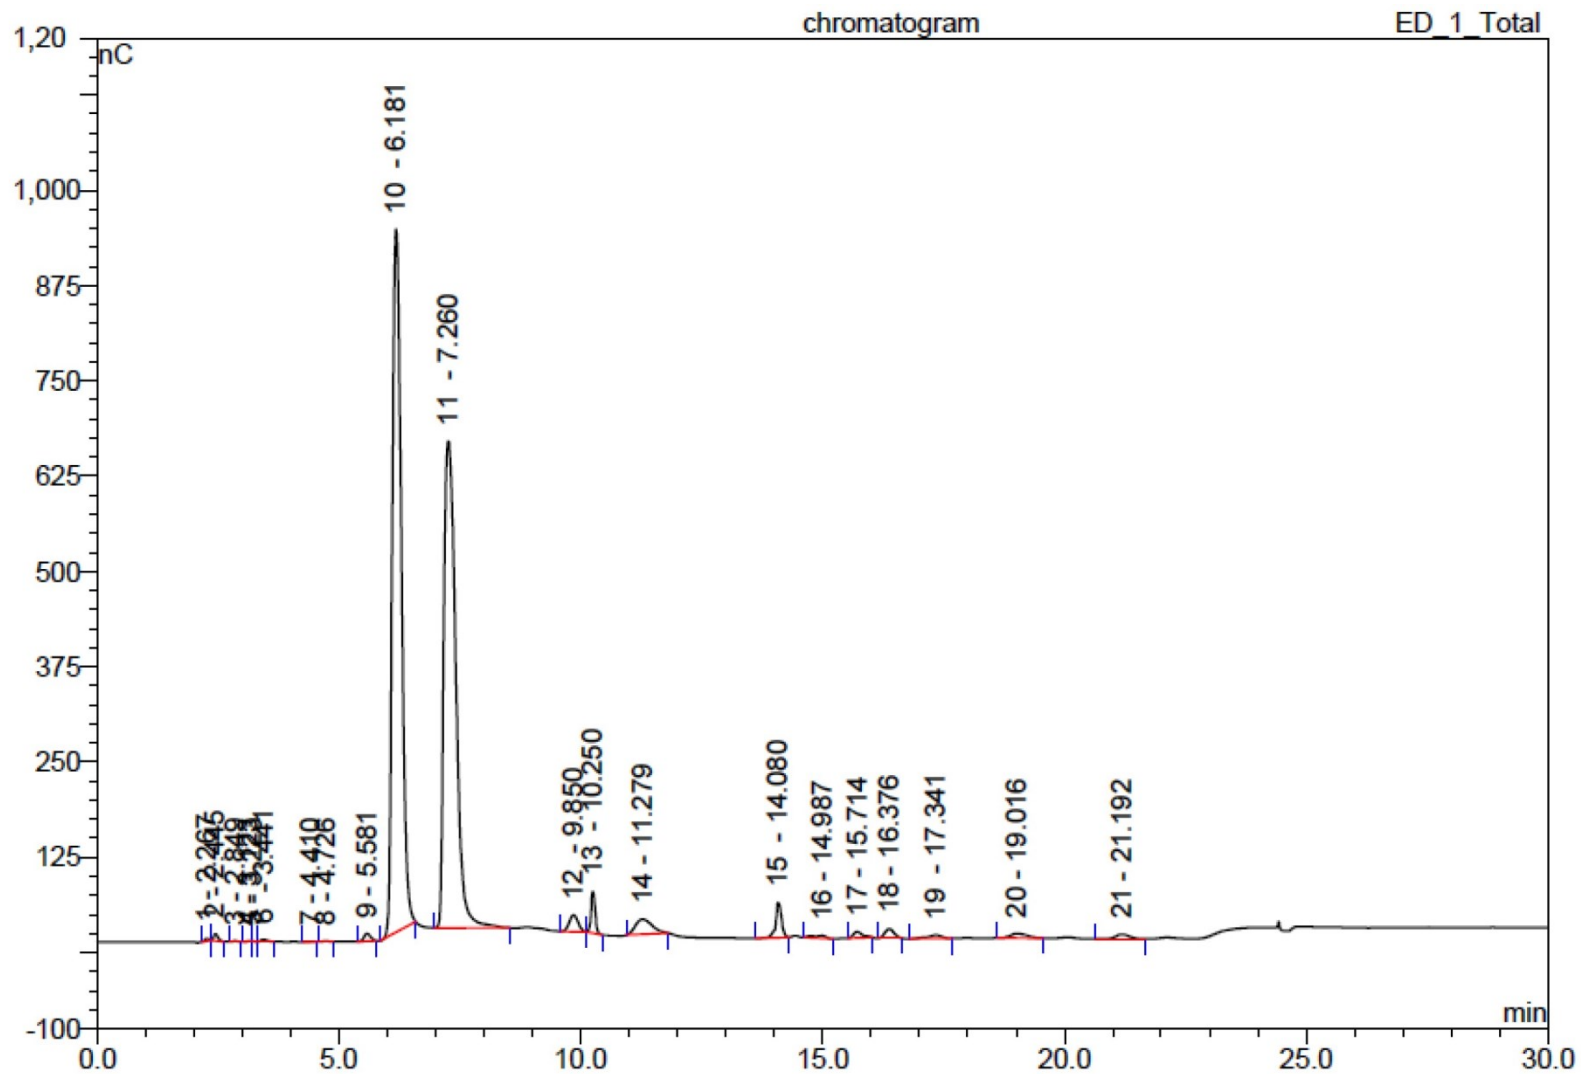

29

30 **Figure S1.** Chromatogram of buckwheat flower extract: 1.Erythritol; 2.Glycerol; 3.Sorbitol; 4.Galactitol; 5. Mannitol; 6.Trehalose; 7. Rhamnose; 8.  
 31 Arabinose; 9. Xylose; 10. Glucose; 11.Fructose; 12.Melibiose; 13. Isomaltose; 14. Sucrose; 15. Melesitose; 16. Gentiobiose; 17. Turanose; 18.  
 32 Raffinose; 19. Maltose; 20. Panose; 21. Maltotriose.

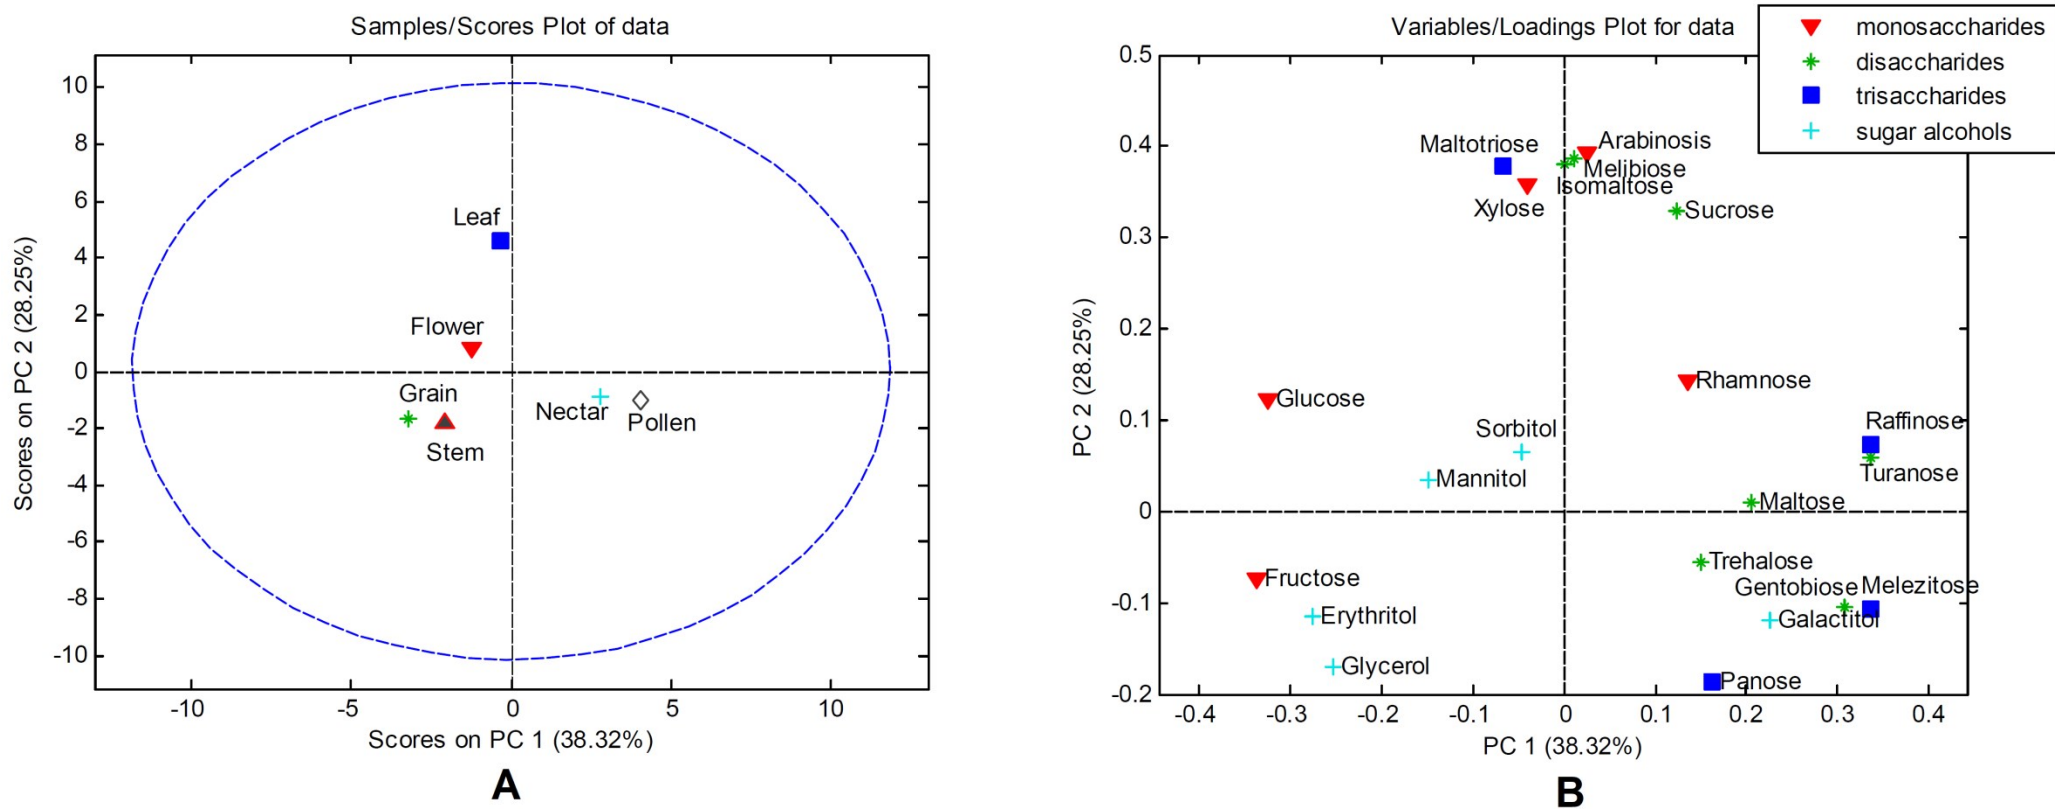

33 **Figure S2.** Sugar-based differentiation of buckwheat (*Fagopyrum esculentum*) extract samples. Principal component scores (A) and loadings plot (B).

34

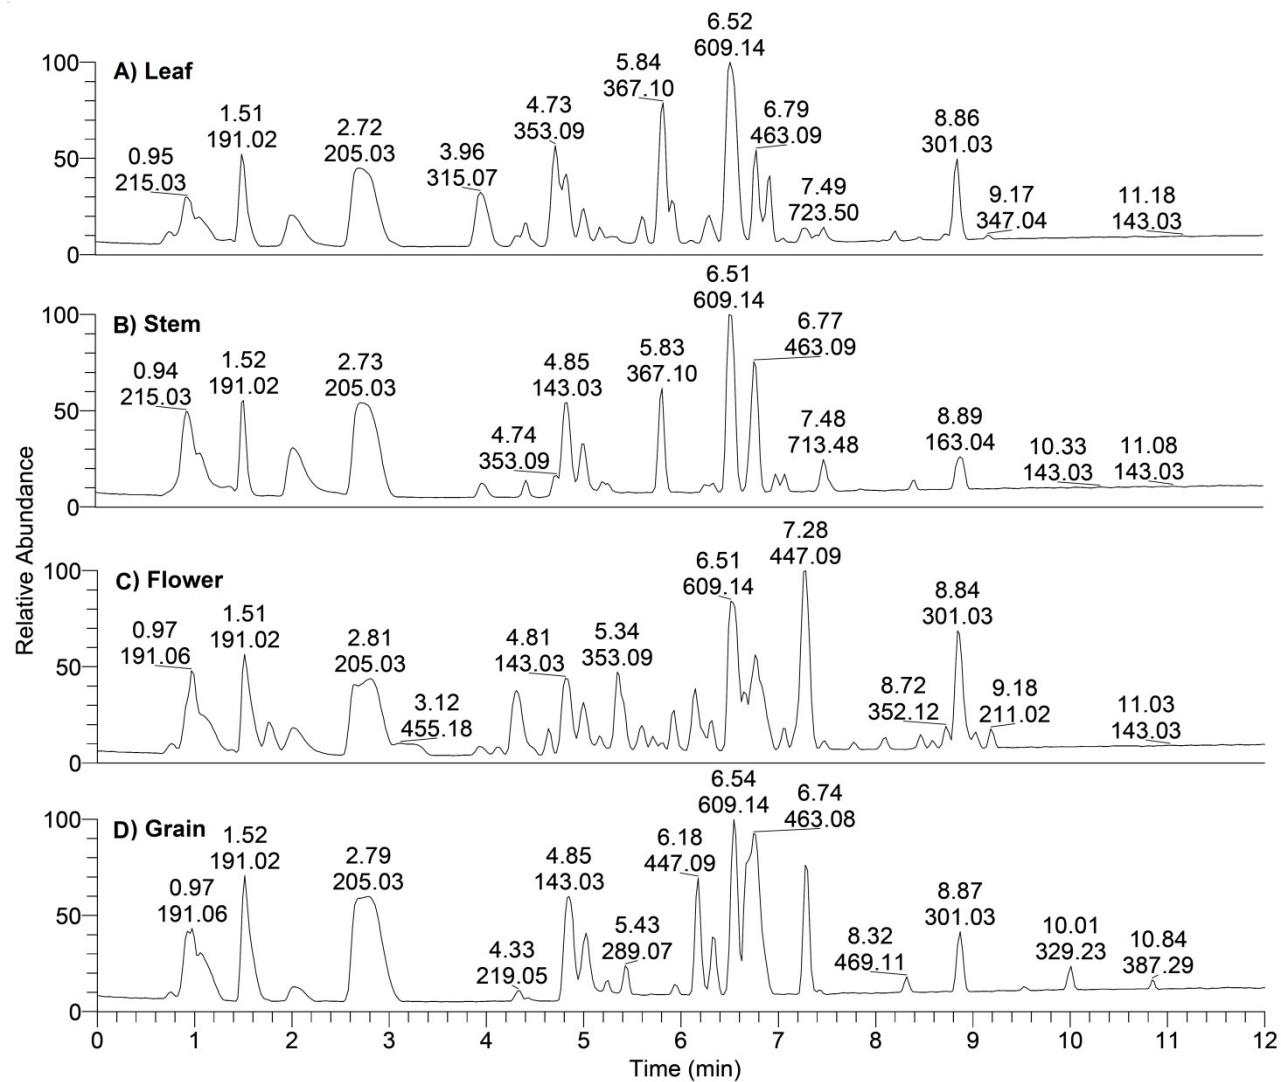

35

36 **Figure S3.** Base peak chromatograms of identified phenolic compounds in the investigated buckwheat sample extracts (the retention times and exact  
 37 masses from for all peak are listed in the Table 2, and in this picture only the most intense).
